# Supplementary material
Source: PubMed Central journal article supplement (PMC2759534)
Supplement: NIHMS127359-supplement-1.pdf [file NIHMS127359-supplement-1.pdf]

**A. *In vivo* bioluminescence imaging**

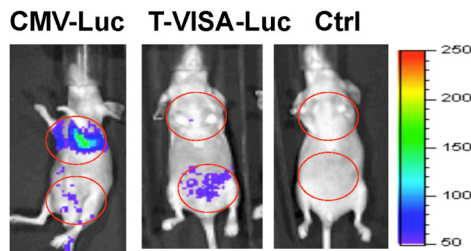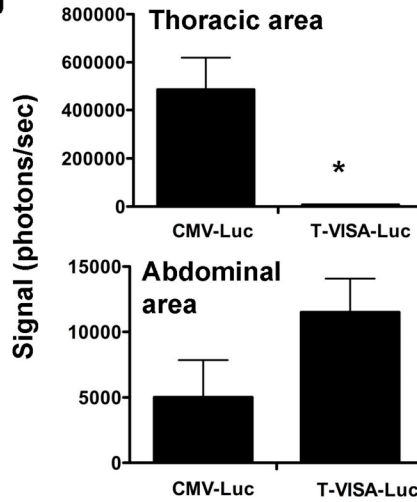

**B. *Ex vivo* imaging of tumors**

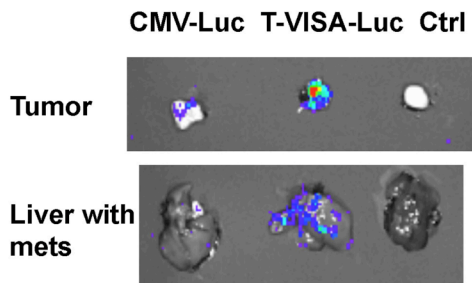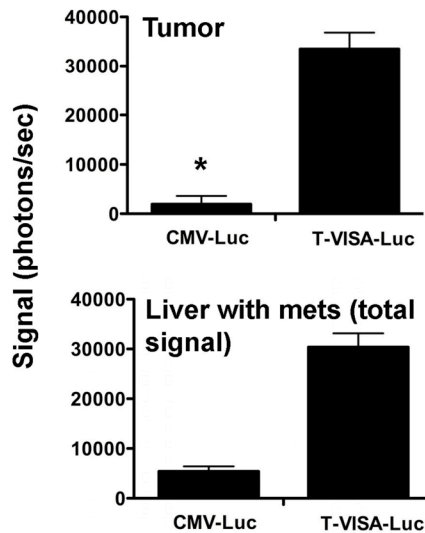

Supplemental Figure 1. Transcriptional targeting of T-VISA directed transgene expression in ovarian cancer cells *in vivo*. (A) Female nude mice bearing orthotopic HeyA8 tumors were given 50  $\mu$ g of DNA in DNA:liposome complexes via tail vein injection. Two days following injection, mice were anesthetized and subjected to *in vivo*

imaging 10 min after intraperitoneal injection of D-luciferin for 2 min. (B) HeyA8 tumors of mice as well as each of their heart/lungs and livers from (A) were subjected to *ex vivo* imaging. The photon signals were quantified by Xenogen's Living Imaging software (shown on the right). Bars, SD; n=3 per group. The plasmids indicated are as follows: CMV-Luc, pGL3-CMV-Luc; T-VISA-Luc, pGL3-hTERT-VISA-Luc; Ctrl, pGL3-C-VISA. An asterisk indicates a P-value of less than 0.05.
